# Supplementary material for: Unique ethnic features of DDX41 mutations in patients with idiopathic cytopenia of undetermined significance, myelodysplastic syndrome, or acute myeloid leukemia
Source: PubMed Central journal article supplement — Haematologica. 2021 Feb 25;107(2):510–8. doi: 10.3324/haematol.2020.270553 (PMC8804579; doi:10.3324/haematol.2020.270553), 2021-02-25
Supplement: 2020_270553_CHOI_SUPPL.pdf [file 2020_270553_CHOI_SUPPL.pdf]

## Unique ethnic features of *DDX41* mutations in patients with idiopathic cytopenia of undetermined significance, myelodysplastic syndrome, or acute myeloid leukemia

Eun-Ji Choi,<sup>1\*</sup> Young-Uk Cho,<sup>2\*</sup> Eun-Hye Hur,<sup>1</sup> Seongsoo Jang,<sup>2</sup> Nayoung Kim,<sup>3</sup> Han-Seung Park,<sup>1</sup> Jung-Hee Lee,<sup>1</sup> Kyoo-Hyung Lee,<sup>1</sup> Si-Hwan Kim,<sup>2</sup> Sang-Hyun Hwang,<sup>2</sup> Eul-Ju Seo,<sup>2</sup> Chan-Jeoung Park<sup>2</sup> and Je-Hwan Lee<sup>1</sup>

<sup>1</sup>Department of Hematology, Asan Medical Center, University of Ulsan College of Medicine; <sup>2</sup>Department of Laboratory Medicine, Asan Medical Center, University of Ulsan College of Medicine and <sup>3</sup>Asan Institution for Life Sciences and Department of Convergence Medicine, Asan Medical Center, University of Ulsan College of Medicine, Seoul, Korea

*\*E-JG and Y-UC contributed equally as co-first authors.*

©2022 Ferrata Storti Foundation. This is an open-access paper. doi:10.3324/haematol.2020.270553

Received: August 27, 2020.

Accepted: February 2, 2021.

Pre-published: February 25, 2021.

Correspondence: *JE-HWAN LEE* - [jhlee3@amc.seoul.kr](mailto:jhlee3@amc.seoul.kr)

---

## Supplementary Appendix

**Supplementary Table 1.** List of genes selected for targeted next-generation sequencing

| <b>Gene</b>    | <b>Transcript</b> | <b>Gene</b>   | <b>Transcript</b> |
|----------------|-------------------|---------------|-------------------|
| <i>ABL1</i>    | NM_005157.5       | <i>KIT</i>    | NM_000222.2       |
| <i>ANKRD26</i> | NM_014915.2       | <i>KMT2A</i>  | NM_005933.3       |
| <i>ASXL1</i>   | NM_015338.5       | <i>KRAS</i>   | NM_033360.3       |
| <i>ATM</i>     | NM_000051.3       | <i>LUC7L2</i> | NM_016019.5       |
| <i>BCOR</i>    | NM_001123383.1    | <i>MALT1</i>  | NM_006785.3       |
| <i>BCORL1</i>  | NM_021946.4       | <i>MPL</i>    | NM_005373.2       |
| <i>BRAF</i>    | NM_004333.4       | <i>MYD88</i>  | NM_002468.4       |
| <i>CALR</i>    | NM_004343.3       | <i>NF1</i>    | NM_000267.3       |
| <i>CBL</i>     | NM_005188.3       | <i>NOTCH1</i> | NM_017617.4       |
| <i>CDKN2A</i>  | NM_000077.4       | <i>NPM1</i>   | NM_002520.6       |
| <i>CEBPA</i>   | NM_004364.4       | <i>NRAS</i>   | NM_002524.4       |
| <i>CSF3R</i>   | NM_156039.3       | <i>PHF6</i>   | NM_001015877.1    |
| <i>DDX41</i>   | NM_016222.3       | <i>PTEN</i>   | NM_000314.6       |
| <i>DNMT1</i>   | NM_001379.3       | <i>PTPN11</i> | NM_002834.4       |
| <i>DNMT3A</i>  | NM_022552.4       | <i>RAD21</i>  | NM_006265.2       |
| <i>EED</i>     | NM_003797.4       | <i>RUNX1</i>  | NM_001754.4       |
| <i>EP300</i>   | NM_001429.3       | <i>SETBP1</i> | NM_015559.2       |
| <i>ETNK1</i>   | NM_018638.4       | <i>SETD2</i>  | NM_014159.6       |
| <i>ETV6</i>    | NM_001987.4       | <i>SFI</i>    | NM_004630.3       |
| <i>EZH2</i>    | NM_004456.4       | <i>SF3B1</i>  | NM_012433.3       |
| <i>FBXW7</i>   | NM_033632.3       | <i>SMC1A</i>  | NM_006306.3       |
| <i>FLT3</i>    | NM_004119.2       | <i>SMC3</i>   | NM_005445.3       |
| <i>GATA1</i>   | NM_002049.3       | <i>SRSF2</i>  | NM_003016.4       |
| <i>GATA2</i>   | NM_032638.4       | <i>STAG2</i>  | NM_001042749.2    |
| <i>HRAS</i>    | NM_005343.3       | <i>STAT3</i>  | NM_139276.2       |
| <i>IDH1</i>    | NM_005896.3       | <i>TET2</i>   | NM_001127208.2    |
| <i>IDH2</i>    | NM_002168.3       | <i>TP53</i>   | NM_000546.5       |
| <i>IKZF1</i>   | NM_006060.5       | <i>U2AF1</i>  | NM_001025203.1    |
| <i>JAK2</i>    | NM_004972.3       | <i>WT1</i>    | NM_024426.4       |
| <i>JAK3</i>    | NM_000215.3       | <i>ZRSR2</i>  | NM_005089.3       |
| <i>KDM6A</i>   | NM_021140.3       |               |                   |

**Supplementary Table 2.** *DDX41* variants, concurrent mutations in other genes, and karyotypes at diagnosis in the 28 patients with germline *DDX41* mutations

| Patient        | Sex | Age | Diagnosis,<br>2016 WHO<br>criteria | BM<br>blast<br>(%) | Probable germline <i>DDX41</i> variants |              |         | Somatic <i>DDX41</i> variants |              |         | Concurrent mutations<br>(VAF, %)                                                        | Karyotype                         |
|----------------|-----|-----|------------------------------------|--------------------|-----------------------------------------|--------------|---------|-------------------------------|--------------|---------|-----------------------------------------------------------------------------------------|-----------------------------------|
|                |     |     |                                    |                    | Nucleotide<br>change                    | AA<br>change | VAF (%) | Nucleotide<br>change          | AA<br>change | VAF (%) |                                                                                         |                                   |
| 1              | M   | 54  | ICUS                               | 3.6                | c.776A>G                                | p.Y259C      | 44.7    | c.1574G>A                     | p.R525H      | 5.3     |                                                                                         | 46,XY[20]                         |
| 2              | M   | 54  | ICUS                               | 4.0                | c.455T>G                                | p.V152G      | 48.7    | c.1126G>A                     | p.A376T      | 10.2    |                                                                                         | 46,XY[20]                         |
| 3              | M   | 54  | ICUS                               | 2.0                | c.1496dup                               | p.A500fs     | 50.8    | c.1679C>T                     | p.P560L      | 41.1    | DNMT3A p.R604fs (38.2)                                                                  | 46,XY[20]                         |
| 4              | M   | 65  | ICUS                               | 3.4                | c.455T>G                                | p.V152G      | 40.7    | c.1480A>G                     | p.K494E      | 25.4    | CBL p.I383M (5.8), KMT2A<br>p.T548A (2.6)                                               | 46,XY[20]                         |
| 5              | M   | 67  | ICUS                               | 2.0                | c.776A>G                                | p.Y259C      | 50.0    | c.1759G>C                     | p.G587R      | 3.3     | ETNK1 p.Q28H (7.8),<br>ASXL1 p.H633fs (3.3)                                             | 46,XY[20]                         |
| 6              | M   | 64  | MDS-MLD                            | 1.6                | c.455T>G                                | p.V152G      | 49.6    | c.1574G>A                     | p.R525H      | 27.4    | ASXL1 p.Q1142* (4.3),<br>TP53 p.G266V (2.1)                                             | 46,Y,t(X;3)(q28;q12)[3]/46,XY[17] |
| 7 <sup>a</sup> | M   | 76  | MDS-MLD                            | 4.0                | c.455T>G                                | p.V152G      | 53.5    | c.680C>T                      | p.T227M      | 14.5    | EZH2 p.R684C (3.9)                                                                      | 46,XY[20]                         |
| 8              | M   | 58  | MDS-EB-1                           | 6.6                | c.776A>G                                | p.Y259C      | 45.5    | c.1574G>A                     | p.R525H      | 14.5    | NF1 p.L1411V (14.3), TP53<br>p.R273C (11.2), PHF6<br>p.M1T (8.5), PHF6 p.R116*<br>(3.6) | 46,XY[20]                         |
| 9 <sup>a</sup> | M   | 63  | MDS-MLD                            | 3.2                | c.455T>G                                | p.V152G      | 46.9    | c.680C>T                      | p.T227M      | 12.1    | PHF6 p.G248D (6.8), CBL<br>p.P6825fs (5.1)                                              | 46,XY[20]                         |
| 10             | M   | 76  | MDS-EB-1                           | 6.5                | c.455T>G                                | p.V152G      | 47.9    | c.1574G>A                     | p.R525H      | 10.6    | EZH2 c.625+1G>A (2.2)                                                                   | 46,XY[20]                         |
| 11             | M   | 71  | MDS-EB-1                           | 7.0                | c.776A>G                                | p.Y259C      | 47.6    | c.1574G>A                     | p.R525H      | 13.6    | CBL p.R420L (10.8), NF1                                                                 | 46,XY,add(7)(11.2)[4]/46,XY[16]   |

|                 |   |    |          |      |           |          |      |           |         |      |                                                                                               |                                        |
|-----------------|---|----|----------|------|-----------|----------|------|-----------|---------|------|-----------------------------------------------------------------------------------------------|----------------------------------------|
|                 |   |    |          |      |           |          |      |           |         |      | p.A2625T (10.4), ASXL1<br>p.D784fs (7.7)                                                      |                                        |
| 12              | M | 61 | MDS-EB-2 | 18.2 | c.19G>T   | p.E7*    | 50.4 | c.682G>T  | p.G228C | 14.0 | SRSF2 p.P95H (11.9),<br>ETNK1 p.N244S (8.6)                                                   | 46,XY[20]                              |
| 13              | M | 78 | MDS-EB-1 | 6.8  | c.455T>G  | p.V152G  | 55.6 | c.680C>T  | p.T227M | 25.4 | ETNK1 p.G245A (19.4)                                                                          | 45,X,-Y[6]/46,XY[19]                   |
| 14 <sup>a</sup> | M | 61 | MDS-MLD  | 0.8  | c.776A>G  | p.Y259C  | 43.5 | c.680C>T  | p.T227M | 6.5  | NF1 p.K1423Q (5.0)                                                                            | 46,XY[20]                              |
| 15 <sup>a</sup> | M | 65 | MDS-EB-1 | 8.0  | c.776A>G  | p.Y259C  | 48.9 | c.1574G>A | p.R525H | 14.5 |                                                                                               | 46,XY[10]                              |
| 16 <sup>a</sup> | M | 79 | MDS-EB-1 | 5.6  | c.983T>G  | p.L328R  | 48.1 | c.1588G>A | p.G530S | 22.5 |                                                                                               | 46,XY[20]                              |
| 17 <sup>a</sup> | M | 71 | MDS-EB-1 | 6.2  | c.776A>G  | p.Y259C  | 53.2 | c.1574G>A | p.R525H | 7.7  | DNMT3A p.W893fs (13.6),<br>NF1 p.H1605dup (7.2),<br>DNMT1 p.Y940N (3.0),<br>PHF6 p.C20F (2.6) | 46,XY,del(7)(q22q31)[16]/46,XY[14]     |
| 18              | M | 75 | MDS-EB-1 | 6.0  | c.19G>T   | p.E7*    | 48.1 |           |         |      | KDM6A p.C1331S (5.0),<br>TP53 p.R280I (3.1)                                                   | 46,XY,del(20)(q11.2q13.3)[3]/46,XY[17] |
| 19 <sup>a</sup> | M | 41 | MDS-EB-2 | 19.2 | c.1496dup | p.A500fs | 46.0 | c.1574G>A | p.R525H | 7.7  | CBL p.K389M (6.4)                                                                             | 46,XY[4]                               |
| 20 <sup>a</sup> | M | 62 | MDS-MLD  | 3.4  | c.455T>G  | p.V152G  | 43.4 | c.1574G>A | p.R525H | 18.7 | DNMT3A p.F752del (21.7),<br>IKZF1 p.N159S (3.1)                                               | 46,XY[20]                              |
| 21 <sup>a</sup> | M | 72 | MDS-SLD  | 3.4  | c.455T>G  | p.V152G  | 48.0 | c.1127C>T | p.A376V | 28.9 |                                                                                               | 46,XY[20]                              |
| 22 <sup>a</sup> | M | 65 | MDS-MLD  | 4.8  | c.455T>G  | p.V152G  | 50.8 | c.680C>T  | p.T227M | 35.8 |                                                                                               | 46,XY[20]                              |
| 23 <sup>a</sup> | M | 75 | MDS-EB-2 | 13.8 | c.1496dup | p.A500fs | 46.9 | c.1032C>G | p.D344E | 3.2  | TET2 p.E1728* (3.3), PHF6<br>p.M1T (2.9)                                                      | 46,XY[20]                              |
| 24              | M | 75 | MDS-EB-1 | 7.2  | c.776A>G  | p.Y259C  | 43.6 | c.1574G>A | p.R525H | 5.7  | TET2 p.H1921R (6.6), JAK2<br>p.V617F (4.1)                                                    | 46,XY[20]                              |

|    |   |    |         |      |           |          |      |           |         |      |                                                 |                          |
|----|---|----|---------|------|-----------|----------|------|-----------|---------|------|-------------------------------------------------|--------------------------|
| 25 | M | 74 | AML NOS | 24.0 | c.1496dup | p.A500fs | 45.5 | c.1574G>A | p.R525H | 2.0  | EZH2 c.2196-1G>C (2.0)                          | 46,XY[20]                |
| 26 | M | 63 | AML NOS | 20.2 | c.19G>T   | p.E7*    | 49.2 | c.1574G>A | p.R525H | 2.7  | PHF6 p.M1V (3.8)                                | 46,XY[20]                |
| 27 | F | 71 | AML NOS | 23.6 | c.1496dup | p.A500fs | 50.9 | c.1574G>A | p.R525H | 15.8 | SETBP1 p.D868N (15.4),<br>ASXL1 p.W796fs (15.1) | 46,XX[20]                |
| 28 | M | 69 | AML NOS | 65.2 | c.1496dup | p.A500fs | 47.9 | c.1574G>A | p.R525H | 23.2 | ASXL1 p.R693* (25.7),<br>NRAS p.G12D (7.1)      | 48,XY,+1,+8[8]/46,XY[12] |

WHO: World Health Organization; BM: bone marrow; AA: amino acid; VAF: variant allele frequency; M: male; F: female; ICUS: idiopathic cytopenia of undetermined significance; MDS: myelodysplastic syndrome; MDS-MLD: MDS with multilineage dysplasia; MDS-EB: MDS with excess blasts; MDS-SLD: MDS with single lineage dysplasia; AML NOS, acute myeloid leukemia not otherwise specified.

<sup>a</sup>These patients were confirmed to have germline *DDX41* variants by targeted NGS assay using sorted blood T-cells.

**Supplementary Table 3.** Interpretation of probable germline *DDX41* mutations according to the Genome Aggregation Database<sup>1</sup> and the recommendation of the American College of Medical Genetics and Genomics<sup>2</sup>

| Patient | Nucleotide change | AA change | Somatic <i>DDX41</i> | gnomAD, total | KRGDB   | dbSNP       | SIFT/PolyPhen-2/<br>MutationTaster | ACMG recommendation |                        | Causality |
|---------|-------------------|-----------|----------------------|---------------|---------|-------------|------------------------------------|---------------------|------------------------|-----------|
|         |                   |           |                      |               |         |             |                                    | Criteria            | Interpretation         |           |
| 1       | c.776A>G          | p.Y259C   | Present              | 2.84e-5       | 5.82e-4 | rs139780256 | D/ProD/DC                          | PS4                 | Uncertain significance | Causal    |
| 2       | c.455T>G          | p.V152G   | Present              | 7.96e-6       | 2.94e-4 | rs758775538 | D/B/DC                             | PS4                 | Uncertain significance | Causal    |
| 3       | c.1496dupC        | p.A500fs  | Present              | 7.96e-6       | 0       |             |                                    | PVS1 + PS4          | Pathogenic             | Causal    |
| 4       | c.455T>G          | p.V152G   | Present              | 7.96e-6       | 2.94e-4 | rs758775538 | D/B/DC                             | PS4                 | Uncertain significance | Causal    |
| 5       | c.776A>G          | p.Y259C   | Present              | 2.84e-5       | 5.82e-4 | rs139780256 | D/ProD/DC                          | PS4                 | Uncertain significance | Causal    |
| 6       | c.455T>G          | p.V152G   | Present              | 7.96e-6       | 2.94e-4 | rs758775538 | D/B/DC                             | PS4                 | Uncertain significance | Causal    |
| 7       | c.455T>G          | p.V152G   | Present              | 7.96e-6       | 2.94e-4 | rs758775538 | D/B/DC                             | PS4                 | Uncertain significance | Causal    |
| 8       | c.776A>G          | p.Y259C   | Present              | 2.84e-5       | 5.82e-4 | rs139780256 | D/ProD/DC                          | PS4                 | Uncertain significance | Causal    |
| 9       | c.455T>G          | p.V152G   | Present              | 7.96e-6       | 2.94e-4 | rs758775538 | D/B/DC                             | PS4                 | Uncertain significance | Causal    |
| 10      | c.455T>G          | p.V152G   | Present              | 7.96e-6       | 2.94e-4 | rs758775538 | D/B/DC                             | PS4                 | Uncertain significance | Causal    |
| 11      | c.776A>G          | p.Y259C   | Present              | 2.84e-5       | 5.82e-4 | rs139780256 | D/ProD/DC                          | PS4                 | Uncertain significance | Causal    |
| 12      | c.19G>T           | p.E7*     | Present              | 0             | 0       | rs749405703 |                                    | PVS1 + PS4 + PM2    | Pathogenic             | Causal    |
| 13      | c.455T>G          | p.V152G   | Present              | 7.96e-6       | 2.94e-4 | rs758775538 | D/B/DC                             | PS4                 | Uncertain significance | Causal    |
| 14      | c.776A>G          | p.Y259C   | Present              | 2.84e-5       | 5.82e-4 | rs139780256 | D/ProD/DC                          | PS4                 | Uncertain significance | Causal    |
| 15      | c.776A>G          | p.Y259C   | Present              | 2.84e-5       | 5.82e-4 | rs139780256 | D/ProD/DC                          | PS4                 | Uncertain significance | Causal    |
| 16      | c.983T>G          | p.L328R   | Present              | 0             | 0       |             | D/ProD/DC                          | PM2                 | Uncertain significance | Causal    |
| 17      | c.776A>G          | p.Y259C   | Present              | 2.84e-5       | 5.82e-4 | rs139780256 | D/ProD/DC                          | PS4                 | Uncertain significance | Causal    |
| 18      | c.19G>T           | p.E7*     | Absent               | 0             | 0       | rs749405703 |                                    | PVS1 + PS4 + PM2    | Pathogenic             | Causal    |

|    |            |          |         |         |         |             |           |                  |                        |        |
|----|------------|----------|---------|---------|---------|-------------|-----------|------------------|------------------------|--------|
| 19 | c.1496dupC | p.A500fs | Present | 7.96e-6 | 0       |             |           | PVS1 + PS4       | Pathogenic             | Causal |
| 20 | c.455T>G   | p.V152G  | Present | 7.96e-6 | 2.94e-4 | rs758775538 | D/B/DC    | PS4              | Uncertain significance | Causal |
| 21 | c.455T>G   | p.V152G  | Present | 7.96e-6 | 2.94e-4 | rs758775538 | D/B/DC    | PS4              | Uncertain significance | Causal |
| 22 | c.455T>G   | p.V152G  | Present | 7.96e-6 | 2.94e-4 | rs758775538 | D/B/DC    | PS4              | Uncertain significance | Causal |
| 23 | c.1496dupC | p.A500fs | Present | 7.96e-6 | 0       |             |           | PVS1 + PS4       | Pathogenic             | Causal |
| 24 | c.776A>G   | p.Y259C  | Present | 2.84e-5 | 5.82e-4 | rs139780256 | D/ProD/DC | PS4              | Uncertain significance | Causal |
| 25 | c.1496dupC | p.A500fs | Present | 7.96e-6 | 0       |             |           | PVS1 + PS4       | Pathogenic             | Causal |
| 26 | c.19G>T    | p.E7*    | Present | 0       | 0       | rs749405703 |           | PVS1 + PS4 + PM2 | Pathogenic             | Causal |
| 27 | c.1496dupC | p.A500fs | Present | 7.96e-6 | 0       |             |           | PVS1 + PS4       | Pathogenic             | Causal |
| 28 | c.1496dupC | p.A500fs | Present | 7.96e-6 | 0       |             |           | PVS1 + PS4       | Pathogenic             | Causal |

---

AA: amino acid; gnomAD: Genome Aggregation Database; KRGDB: Korean Reference Genome Database; B: benign; D: deleterious; DC: disease-causing; P: polymorphism;

ProD: probably damaging; T: tolerated; ACMG, American College of Medical Genetics and Genomics.

**Supplementary Table 4.** Odds ratio of probable germline *DDX41* mutations for developing ICUS/MDS/AML in the Korean population

| Variants              | Patients (n=457) | Controls (n=1,722) <sup>a</sup> | Odds ratio (95% CI) |
|-----------------------|------------------|---------------------------------|---------------------|
| Total                 | 29 <sup>b</sup>  | 15                              | 7.7 (4.1–14.5)      |
| p.V152G               | 10               | 1                               | 38.5 (4.9–301.6)    |
| p.Y259C               | 9 <sup>b</sup>   | 2                               | 17.3 (3.7–80.2)     |
| p.A500fs              | 6                | 0                               | 49.6 (2.8–882.1)    |
| p.E7*                 | 3                | 0                               | 26.5 (1.4–514.5)    |
| p.L328R               | 1                | 0                               | 11.3 (0.5 – 278.4)  |
| ICUS/MDS <sup>c</sup> | 25 <sup>b</sup>  | 15                              | 10.9 (5.7 – 21.0)   |
| p.V152G               | 10               | 1                               | 62.6 (8.0 – 490.8)  |
| p.Y259C               | 9 <sup>b</sup>   | 2                               | 28.0 (6.0 – 130.5)  |
| p.A500fs              | 3                | 0                               | 42.7 (2.2 – 828.5)  |
| p.E7*                 | 2                | 0                               | 30.4 (1.5 – 634.5)  |
| p.L328R               | 1                | 0                               | 18.2 (0.7 – 447.0)  |
| AML <sup>d</sup>      | 4                | 15                              | 2.7 (0.9 – 8.3)     |
| p.A500fs              | 3                | 0                               | 71.1 (3.7 – 1383.0) |
| p.E7*                 | 1                | 0                               | 30.1 (1.2 – 742.5)  |

Abbreviations: AML, acute myeloid leukemia; CI, confidence interval; ICUS, idiopathic cytopenia of undetermined significance; MDS, myelodysplastic syndrome.

<sup>a</sup>Frequencies of *DDX41* variants in healthy controls were based on the Korean Reference Genome Database (<http://coda.nih.go.kr/coda/KRGDB/index.jsp>). <sup>b</sup>A patient of MDS harboring p.Y259C was considered as non-causal owing to an absence of the somatic *DDX41* mutation was included. <sup>c</sup>The number of patients was 285. <sup>d</sup>The number of patients was 172.



**Supplementary Table 5.** Types of germline *DDX41* mutations and the concurrent somatic *DDX41* mutations according to the type of hematologic malignancy

|                                               | ICUS/MDS (n=24) | AML (n=4) |
|-----------------------------------------------|-----------------|-----------|
| Type of germline <i>DDX41</i> mutations       |                 |           |
| p.V152G (%) <sup>a</sup>                      | 10 (41.7)       | 0         |
| p.Y259C (%) <sup>a</sup>                      | 8 (33.3)        | 0         |
| p.A500fs (%)                                  | 3 (12.5)        | 3 (75.0)  |
| p.E7* (%)                                     | 2 (8.3)         | 1 (25.0)  |
| p.L328R                                       | 1 (4.2)         | 0         |
| Concurrent somatic <i>DDX41</i> mutations (%) | 23 (95.8)       | 4 (100.0) |
| p.R525H (%)                                   | 10 (43.5)       | 4 (100.0) |
| p.T227M (%)                                   | 5 (21.7)        | 0         |
| Others (%)                                    | 8 (34.8)        | 0         |

AML: acute myeloid leukemia; ICUS: idiopathic cytopenia of undetermined significance; MDS: myelodysplastic syndrome; VAF: variant allele frequency.

Bold indicates the significant differences. <sup>a</sup>The combined frequency of p.V152G and p.Y259C was significantly higher in the ICUS/MDS (75.0%) than in the AML (0%) patients ( $P=0.01$ ).

**Supplementary Table 6.** Concurrent somatic *DDX41* mutations according to the three most common germline *DDX41* mutations

|             | Germline <i>DDX41</i> mutation |               |                  | <i>P</i> <sup>a</sup>       |
|-------------|--------------------------------|---------------|------------------|-----------------------------|
|             | p.V152G (n=10)                 | p.Y259C (n=8) | p.A500fs (n = 6) |                             |
| p.R525H (%) | 3 (30.0)                       | 6 (75.0)      | 4 (66.7)         | <b>0.032</b> , 0.129, 1.000 |
| p.T227M (%) | 4 (40.0)                       | 1 (12.5)      | 0                | 0.314, 0.234, 1.000         |
| Others (%)  | 3 (30.0)                       | 1 (12.5)      | 2 (33.3)         | 0.588, 1.000, 0.538         |

VAF: variant allele frequency.

Bold indicates the significant differences. <sup>a</sup>*P* values were derived from comparisons between p.V152G and p.Y259C, p.V152G and p.A500fs, and p.Y259C and p.A500fs, respectively.

**Supplementary Table 7.** Clinical courses of the patients with *DDX41* mutations

| No.             | Sex | Age | Dx   | Subtype  | Probable germline | Somatic            | Clinical course                                                                                                                                                                                                      |
|-----------------|-----|-----|------|----------|-------------------|--------------------|----------------------------------------------------------------------------------------------------------------------------------------------------------------------------------------------------------------------|
| 1               | M   | 54  | ICUS |          | p.Y259C           | p.R525H            | Evolved to MDS-EB-1 77.9 months after ICUS diagnosis; Scheduled for allogeneic HCT.                                                                                                                                  |
| 2               | M   | 64  | ICUS |          |                   | p.T227M<br>p.Q63fs | Lost to follow-up; Died of unknown cause after 35.9 months from diagnosis.                                                                                                                                           |
| 3               | M   | 54  | ICUS |          | p.V152G           | p.A376T            | Evolved to MDS-EB-1 17.6 months after ICUS diagnosis; Progressed to MDS-EB-2 two months after MDS-EB-1 diagnosis; Alive without relapse four years after allogeneic HCT from a haploidentical donor (patient's son). |
| 4               | M   | 54  | ICUS |          | p.A500fs          | p.P560L            | Lost to follow-up.                                                                                                                                                                                                   |
| 5               | M   | 65  | ICUS |          | p.V152G           | p.K494E            | Alive without evidence of disease evolution 31.3 months after ICUS diagnosis; A family history of Hodgkin lymphoma (patient's son).                                                                                  |
| 6               | M   | 67  | ICUS |          | p.Y259C           | p.G587R            | Evolved to MDS-EB-2 nine months after ICUS diagnosis with a gain of <i>PTPN11</i> mutation; One course of azacitidine; After that, best supportive care for four months.                                             |
| 7               | M   | 54  | MDS  | MDS-MLD  | p.V152G           | p.R525H            | Died of pneumonia 3.4 months after allogeneic HCT from a matched unrelated donor.                                                                                                                                    |
| 8               | M   | 52  | MDS  | MDS-U    | p.Y259C           |                    | Received two courses of azacitidine (SD) before HCT; Alive without relapse 44 months after allogeneic HCT from a haploidentical donor (patient's son).                                                               |
| 9 <sup>1</sup>  | M   | 76  | MDS  | MDS-MLD  | p.V152G           | p.T227M            | Received danazol for 1.5 years; Alive in SD without HI.                                                                                                                                                              |
| 10              | M   | 58  | MDS  | MDS-EB-1 | p.Y259C           | p.R525H            | Progressed to MDS-EB-2 49.8 months after MDS diagnosis; Alive without relapse 16.5 months after allogeneic HCT from a matched unrelated donor.                                                                       |
| 11 <sup>1</sup> | M   | 62  | MDS  | MDS-MLD  | p.V152G           | p.T227M            | Not responded to cyclosporine, erythropoietin-stimulating agent, and one course of decitabine.                                                                                                                       |
| 12              | M   | 76  | MDS  | MDS-EB-1 | p.V152G           | p.R525H            | Lost to follow-up.                                                                                                                                                                                                   |
| 13              | M   | 71  | MDS  | MDS-EB-1 | p.Y259C           | p.R525H            | Achieved HI with decitabine treatment; Progressed to MDS-EB-2 after 23 courses of decitabine; Died of unknown cause one year after progression.                                                                      |

|                 |   |    |     |          |          |         |                                                                                                                                                                                                         |
|-----------------|---|----|-----|----------|----------|---------|---------------------------------------------------------------------------------------------------------------------------------------------------------------------------------------------------------|
| 14              | M | 60 | MDS | MDS-EB-2 | p.E7*    | p.G228C | Received eight courses of decitabine (SD) before HCT; Alive without relapse 8.7 months after allogeneic HCT from a haploidentical donor (patient's son without <i>DDX41</i> mutation).                  |
| 15              | M | 78 | MDS | MDS-EB-1 | p.V152G  | p.T227M | Progressed to MDS-EB-2 50.2 months after MDS diagnosis; Achieved PR after six courses of azacitidine; Loss of the response after 21 courses of azacitidine; Died of infection.                          |
| 16 <sup>1</sup> | M | 61 | MDS | MDS-MLD  | p.Y259C  | p.T227M | Progressed to MDS-EB-1 91.5 months after MDS diagnosis; Received six courses of decitabine (SD).                                                                                                        |
| 17 <sup>1</sup> | M | 64 | MDS | MDS-EB-1 | p.Y259C  | p.R525H | Alive in stable disease 13.6 months after MDS diagnosis; Scheduled for allogeneic HCT.                                                                                                                  |
| 18 <sup>1</sup> | M | 79 | MDS | MDS-EB-1 | p.L328R  | p.G530S | Received danazol for one year; Alive in SD without HI.                                                                                                                                                  |
| 19 <sup>1</sup> | M | 71 | MDS | MDS-EB-1 | p.Y259C  | p.R525H | Received 13 courses of azacitidine; Alive in SD.                                                                                                                                                        |
| 20              | M | 75 | MDS | MDS-EB-1 | p.E7*    |         | Lost to follow-up.                                                                                                                                                                                      |
| 21 <sup>1</sup> | M | 41 | MDS | MDS-EB-2 | p.A500fs | p.R525H | Received four courses of decitabine (SD) before HCT; Alive without relapse four months after allogeneic HCT from a matched unrelated donor.                                                             |
| 22 <sup>1</sup> | M | 62 | MDS | MDS-MLD  | p.V152G  | p.R525H | Died of pneumonia after one course of decitabine.                                                                                                                                                       |
| 23 <sup>1</sup> | M | 72 | MDS | MDS-SLD  | p.V152G  | p.A376V | Alive without disease progression seven months after MDS diagnosis.                                                                                                                                     |
| 24 <sup>1</sup> | M | 65 | MDS | MDS-MLD  | p.V152G  | p.T227M | Progressed to MDS-EB-1 33.6 months after MDS diagnosis; Alive without relapse eight weeks after allogeneic HCT from a matched unrelated donor.                                                          |
| 25 <sup>1</sup> | M | 75 | MDS | MDS-EB-2 | p.A500fs | p.D344E | Received nine courses of azacitidine (SD).                                                                                                                                                              |
| 26              | M | 74 | MDS | MDS-MLD  | p.Y259C  | p.R525H | Alive without disease progression six months after MDS diagnosis.                                                                                                                                       |
| 27              | M | 53 | MDS | MDS-EB-1 | p.D139G  |         | Progressed to MDS-EB-2 29.6 months after MDS diagnosis; Progressed to AML 31.0 months after MDS diagnosis.                                                                                              |
| 28              | M | 76 | AML | NOS      | p.A500fs | p.R525H | Achieved CR with Guadecitabine; Relapsed; Died of disease progression                                                                                                                                   |
| 29 <sup>2</sup> | F | 59 | AML | RGA      | p.E3K    |         | Relapsed 7.7 months after the end of consolidation chemotherapy; Achieved the second CR with salvage chemotherapy; Alive without relapse 15 months after allogeneic HCT from a matched unrelated donor. |
| 30              | M | 57 | AML | NOS      | p.Y33C   |         | Achieved CR with intensive chemotherapy; Alive without relapse 13.6 months after allogeneic HCT from a matched unrelated donor.                                                                         |
| 31              | F | 66 | AML | RGA      | p.D139G  |         | Relapsed 13 months after the end of consolidation chemotherapy; Achieved the second CR with salvage chemotherapy;                                                                                       |

|                 |   |    |     |       |          |                    |                                                                                                                                                                                                                                                       |
|-----------------|---|----|-----|-------|----------|--------------------|-------------------------------------------------------------------------------------------------------------------------------------------------------------------------------------------------------------------------------------------------------|
|                 |   |    |     |       |          |                    | Underwent allogeneic HCT from a haploidentical donor (patient's son).                                                                                                                                                                                 |
| 32              | M | 20 | AML | APL   | p.K187R  |                    | Relapsed 11 months after the end of consolidation chemotherapy; Achieved the second CR with arsenic trioxide; Alive without relapse 15.8 months after allogeneic HCT from a haploidentical donor (patient's father).                                  |
| 33              | F | 62 | AML | NOS   |          | p.R525H            | Relapsed 4 years after allogeneic HCT in the first CR from a matched sibling donor; Achieved the second CR with salvage chemotherapy; alive without relapse 9.8 months after the second allogeneic HCT from a haploidentical donor (patient's son).   |
| 34              | M | 79 | AML | MRC   |          | p.A488T            | Received four courses of decitabine; Died of pneumonia and persistent disease.                                                                                                                                                                        |
| 35              | M | 67 | AML | NOS   | p.E7*    | p.R525H            | Relapsed 4 years after allogeneic HCT in the first CR from a haploidentical donor (patient's son); Achieved the second CR with salvage chemotherapy; Alive without relapse 3.4 months after the second allogeneic HCT from a matched unrelated donor. |
| 36 <sup>3</sup> | F | 47 | AML | t-AML |          | p.P560L<br>p.P321L | History of alkylating agents-containing chemotherapy for metastatic ovarian cancer; Achieved CR with intensive chemotherapy; Under consolidation chemotherapy.                                                                                        |
| 37              | F | 71 | AML | MPAL  | p.A500fs | p.R525H            | Refractory to intensive induction chemotherapy; Achieved CR after 2 courses of LDAC; Under LDAC chemotherapy.                                                                                                                                         |
| 38              | M | 69 | AML | NOS   | p.A500fs | p.R525H            | Lost to follow-up; Died of unknown cause one month after diagnosis                                                                                                                                                                                    |
| 39              | M | 54 | AML | RGA   |          | p.A100E            | Achieved CR with intensive chemotherapy; Under consolidation chemotherapy.                                                                                                                                                                            |

---

Abbreviations: AML, acute myeloid leukemia; APL, acute promyelocytic leukemia; CR, complete remission; Dx, diagnosis; EB, excess blasts; HCT, hematopoietic cell transplantation; HI, hematologic improvement; ICUS, idiopathic cytopenia of undetermined significance; LDAC, low-dose cytarabine; MDS, myelodysplastic syndrome; MLD, multilineage dysplasia; MRC, myelodysplasia-related changes; No., number; NOS, not otherwise specified; PR, partial remission; RGA, recurrent genetic abnormalities; SD, stable disease; SLD, single lineage dysplasia; t-AML, therapy-related AML; U, unclassifiable.

**Supplementary Figure 1.** (A) Overall survival curves according to the presence of *DDX41* mutations. (B) Event-free survival curves according to the presence of *DDX41* mutations.

**A**

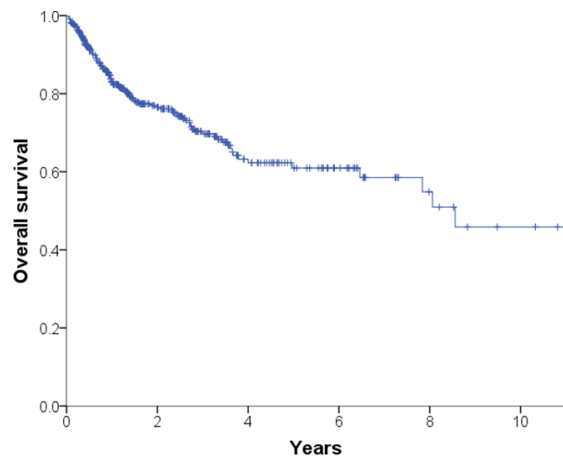

**B**

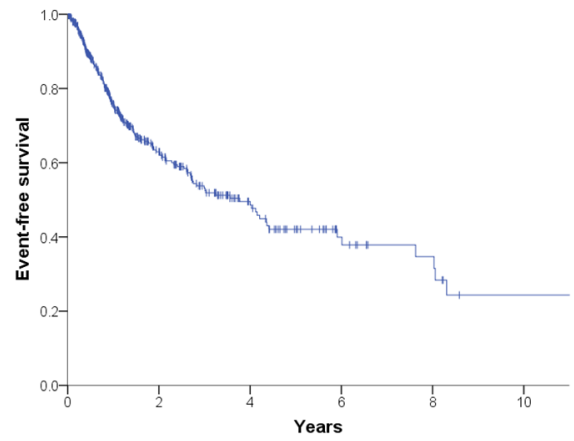

## REFERENCE

1. Karczewski KJ, Francioli LC, Tiao G, et al. The mutational constraint spectrum quantified from variation in 141,456 humans. *Nature*. 2020;581(7809):434-443.
2. Richards S, Aziz N, Bale S, et al: Standards and guidelines for the interpretation of sequence variants: a joint consensus recommendation of the American College of Medical Genetics and Genomics and the Association for Molecular Pathology. *Genet Med*. 2015;17(5):405-423.
